# Supplementary material for: Effectiveness of Palivizumab in High-risk Infants and Children: A Propensity Score Weighted Regression Analysis
Source: PubMed Central journal article supplement — Pediatr Infect Dis J. 2017 Jan 3;36(8):699–704. doi: 10.1097/INF.0000000000001533 (PMC5516669; doi:10.1097/inf.0000000000001533), 2017-01-03
Supplement: inf-36-699-s001.pdf [file inf-36-699-s001.pdf]

**Supplemental Digital Content 1. Univariate Analysis Results Associated with Palivizumab Treatment**

|                                              |           | <b>Palivizumab</b> | <b>Controls</b> |                |
|----------------------------------------------|-----------|--------------------|-----------------|----------------|
|                                              |           | N = 434            | N = 415         | <b>P value</b> |
| <b>Age (months), Median (IQR)</b>            |           | 6.2 (3.6, 11.2)    | 3.8 (1.8, 8.1)  | <0.0001        |
| <b>N (%)</b>                                 | <3 months | 78 (18.0)          | 173 (41.7)      |                |
|                                              | 3-6months | 131 (30.2)         | 109 (26.3)      |                |
|                                              | >6 months | 225 (51.8)         | 133 (32.0)      |                |
| <b>Sex: Male, N (%)</b>                      |           | 246 (56.7)         | 250 (60.2)      | 0.2932         |
| <b>Race/Ethnicity, N (%)</b>                 |           |                    |                 |                |
| White/non-Hispanic                           |           | 214 (49.3)         | 175 (42.2)      | 0.0370         |
| Hispanic                                     |           | 93 (21.4)          | 128 (30.8)      | 0.0018         |
| Black                                        |           | 89 (20.5)          | 78 (18.8)       | 0.5308         |
| Asian                                        |           | 11 (2.5)           | 12 (2.9)        |                |
| Other                                        |           | 27 (6.2)           | 22 (5.3)        |                |
| <b>Gestational Age (weeks), Median (IQR)</b> |           | 29 (26, 33)        | 34 (31, 35)     | <0.0001        |
| <b>N (%)</b>                                 | <29 wGA   | 198 (45.6)         | 69 (16.6)       |                |
|                                              | 29-31 wGA | 75 (17.3)          | 38 (9.2)        |                |
|                                              | 32-34 wGA | 90 (20.7)          | 170 (41.0)      |                |
|                                              | 35 wGA    | 20 (4.6)           | 82 (19.8)       |                |

|                                                       |           |                  |                   |         |
|-------------------------------------------------------|-----------|------------------|-------------------|---------|
|                                                       | ≥36 wGA   | 50 (11.5)        | 55 (13.3)         |         |
|                                                       | N missing | 1 (0.2)          | 1 (0.2)           |         |
| <b>Birth weight (g), Median (IQR)</b>                 |           | 1300 (800, 2000) | 2150 (1600, 2600) | <0.0001 |
| <b>N (%)</b>                                          | <500      | 5 (1.2)          | 0 (0)             |         |
|                                                       | 500-999   | 141 (32.5)       | 37 (8.9)          |         |
|                                                       | 1000-1499 | 90 (20.7)        | 52 (12.5)         |         |
|                                                       | 1500-1999 | 74 (17.1)        | 67 (16.1)         |         |
|                                                       | 2000-2500 | 56 (12.9)        | 131 (31.6)        |         |
|                                                       | >2500     | 51 (11.8)        | 103 (24.8)        |         |
|                                                       | N missing | 17 (3.9)         | 25 (6.0)          |         |
| <b>Multiple (versus Single) birth, N (%)</b>          |           | 104 (24.0)       | 77 (18.6)         | 0.0546  |
| <b>Birth NICU admission, N (%)</b>                    |           |                  |                   |         |
| Yes, N (%)                                            |           | 371 (85.5)       | 285 (68.7)        | <0.0001 |
| No, N (%)                                             |           | 35 (8.1)         | 99 (23.9)         |         |
| N missing                                             |           | 28 (6.5)         | 31 (7.5)          |         |
| <b>Duration of Birth NICU admission, Median (IQR)</b> |           | 64 (30, 104)     | 18 (10, 45)       | <0.0001 |
| <b>N (%)</b>                                          | 1-2 days  | 4 (0.9)          | 13 (3.1)          |         |
|                                                       | 3-7days   | 9 (2.1)          | 47 (11.3)         |         |
|                                                       | 8-14 days | 32 (7.4)         | 61 (14.7)         |         |

|                                                            |                                   |            |            |         |
|------------------------------------------------------------|-----------------------------------|------------|------------|---------|
|                                                            | >14 days                          | 326 (75.1) | 164 (39.5) |         |
|                                                            | N missing                         | 63 (14.5)  | 130 (31.3) |         |
| <b>Medical conditions (%)</b>                              |                                   | 328 (75.6) | 152 (36.6) | <0.0001 |
| <b>N (%)</b>                                               | < 29 wGA                          | 198 (45.6) | 69 (16.6)  | 0.0018  |
|                                                            | No CLD or CHD ( $\geq$ 29 wGA)    | 105 (24.2) | 262 (63.1) | <0.0001 |
|                                                            | 29-31 wGA                         | 37 (8.5)   | 30 (7.2)   |         |
|                                                            | 32-34 wGA                         | 58 (13.4)  | 155 (37.3) |         |
|                                                            | 35 wGA                            | 10 (2.3)   | 77 (18.6)  |         |
|                                                            | Any CLD ( $\geq$ 29 wGA)          | 68 (15.7)  | 23 (5.5)   | <0.0001 |
|                                                            | Any CHD ( $\geq$ 29 wGA)          | 78 (18.0)  | 63 (15.2)  | <0.0001 |
|                                                            | Both CLD and CHD ( $\geq$ 29 wGA) | 16 (3.7)   | 3 (0.7)    | <0.0001 |
|                                                            | N missing                         | 1 (0.2)    | 1 (0.2)    |         |
| <b>Number of Adults in household, Median (IQR)</b>         |                                   | 2 (2, 3)   | 2 (2, 3)   | 0.3934  |
| <b>N (%)</b>                                               | 0                                 | -          | -          | -       |
|                                                            | 1                                 | 35 (8.1)   | 39 (9.4)   |         |
|                                                            | 2                                 | 264 (60.8) | 247 (59.5) |         |
|                                                            | $\geq$ 3                          | 107 (24.7) | 98 (23.6)  |         |
|                                                            | N missing                         | 28 (6.5)   | 31 (7.5)   |         |
| <b>Number of other children in household, Median (IQR)</b> |                                   | 2 (1, 2)   | 2 (1, 2)   | 0.2963  |

|                                                                |           |            |            |        |
|----------------------------------------------------------------|-----------|------------|------------|--------|
| <b>N (%)</b>                                                   | 0         | 82 (18.9)  | 65 (15.7)  |        |
|                                                                | 1         | 116 (26.7) | 124 (29.9) |        |
|                                                                | 2         | 112 (25.8) | 101 (24.3) |        |
|                                                                | ≥3        | 95 (21.9)  | 94 (22.7)  |        |
|                                                                | N missing | 29 (6.7)   | 31 (7.5)   |        |
| <b>Total Number of Other People in Household, Median (IQR)</b> |           | 4 (3, 5)   | 4 (3, 5)   | 0.3165 |
| N missing                                                      |           | 30 (6.9)   | 31 (7.5)   |        |
| <b>Age of other children in household, Median (IQR)</b>        |           | 5 (2, 8)   | 4 (2, 8)   | 0.0420 |
| <6 years                                                       |           | 279 (64.3) | 284 (68.4) | 0.1001 |
| 6-12 years                                                     |           | 145 (33.4) | 127 (30.6) | 0.2091 |
| >12 years                                                      |           | 57 (13.1)  | 49 (11.8)  |        |
| N missing                                                      |           | 30 (6.9)   | 33 (8.0)   |        |
| <b>Breastfed, N (%)</b>                                        |           |            |            |        |
| Yes, N (%)                                                     |           | 46 (10.6)  | 73 (17.6)  | 0.0026 |
| No, N (%)                                                      |           | 360 (82.9) | 311 (74.9) |        |
| N missing                                                      |           | 28 (6.5)   | 31 (7.5)   |        |
| <b>Daycare attendance, N (%)</b>                               |           |            |            |        |
| Yes, N (%)                                                     |           | 39 (9.0)   | 40 (9.6)   | 0.7044 |
| No, N (%)                                                      |           | 367 (84.3) | 344 (82.9) |        |

|                                                |            |            |        |
|------------------------------------------------|------------|------------|--------|
| N missing                                      | 28 (6.5)   | 31 (7.5)   |        |
| <b>Maternal Education in Grades, Mean (SD)</b> | 12.7 (2.7) | 12.2 (2.8) | 0.0215 |
| N missing                                      | 88 (20.3)  | 93 (22.4)  |        |
| <b>Maternal Age in Years, Mean (SD)</b>        | 29.3 (7.6) | 27.7 (7.2) | 0.0012 |
| N missing                                      | 39 (9.0)   | 42 (10.1)  |        |
| <b>Mother employed, N (%)</b>                  |            |            |        |
| Yes, N (%)                                     | 130 (30.0) | 135 (32.5) | 0.3785 |
| No, N (%)                                      | 269 (62.0) | 243 (58.6) |        |
| N missing                                      | 35 (8.1)   | 37 (8.9)   |        |
| <b>Father employed, N (%)</b>                  |            |            |        |
| Yes, N (%)                                     | 272 (62.7) | 262 (63.1) | 0.434  |
| No, N (%)                                      | 65 (15.0)  | 62 (14.9)  |        |
| N missing                                      | 97 (22.4)  | 91 (21.9)  |        |
| <b>Family with Atopy, N (%)</b>                |            |            |        |
| Yes, N (%)                                     | 130 (30.0) | 141 (34.0) | 0.9939 |
| No, N (%)                                      | 256 (59.0) | 228 (54.9) |        |
| N missing                                      | 48 (11.1)  | 46 (11.1)  |        |
| <b>Smoking in household, N (%)</b>             | 147 (33.9) | 152 (36.6) | 0.4010 |

|                                                               |            |            |        |
|---------------------------------------------------------------|------------|------------|--------|
| <b>Timing of admission in relation to illness onset N (%)</b> |            |            | 0.1002 |
| At illness onset- 24 hours                                    | 51 (11.8)  | 43 (10.4)  |        |
| >24 hours-72 hours                                            | 185 (42.6) | 164 (39.5) |        |
| ≥72 hours                                                     | 192 (44.2) | 201 (48.4) |        |
| N missing                                                     | 6 (1.4)    | 7 (1.7)    |        |
| <b>Timing of beginning of RSV season to admission, N (%)</b>  |            |            | 0.3920 |
| November 1-November 30                                        | 38 (8.8)   | 39 (9.4)   |        |
| December 1-December 31                                        | 62 (14.3)  | 50 (12.0)  |        |
| January 1-January 31                                          | 87 (20.0)  | 92 (22.2)  |        |
| February 1-February 28                                        | 105 (24.2) | 122 (29.4) |        |
| March 1-March 31                                              | 99 (22.8)  | 73 (17.6)  |        |
| April 1-April 30                                              | 43 (9.9)   | 38 (9.2)   |        |
| <b>Year of RSV season</b>                                     |            |            | 0.0297 |
| Dec 2002 - Apr 2003                                           | 28 (6.5)   | 31 (7.5)   |        |
| Nov 2003 - Apr 2004                                           | 190 (43.8) | 148 (35.7) |        |
| Nov 2004 - Apr 2005                                           | 107 (24.7) | 98 (23.6)  |        |
| Nov 2005 – Apr 2006                                           | 109 (25.1) | 138 (33.3) |        |

wGA = weeks of gestational age; g = grams; IQR = interquartile range; NICU = neonatal intensive care unit; RSV = respiratory syncytial virus; CLD = chronic lung disease of prematurity; hsCHD = hemodynamically significant congenital heart disease; SD = standard deviation;
